# Supplementary material
Source: Springer Nature journal article supplement (https://www.springermedizin.de/resource/supplementary/12890_2008_137_MOESM3_ESM.pdf/9506062)
Supplement: MOESM3 [file 9506062]

Table 3

Fold Change: average fold increase or decrease compared to average of wild-type arrays  
 Absolute Change: Wild-type array values subtracted from homozygote knockout array values

| Symbol                                                                       | gene                                                | EntrezGene | Fold Change |       | Absolute Change |
|------------------------------------------------------------------------------|-----------------------------------------------------|------------|-------------|-------|-----------------|
|                                                                              |                                                     |            | +/ -        | - / - |                 |
| <b>Cell Cycle &amp; Apoptosis</b>                                            |                                                     |            |             |       |                 |
| Bcl2l11                                                                      | BCL2-like 11 (apoptosis facilitator)                | 12125      | -1.0        | -1.3  | -220            |
| Ccn1                                                                         | cyclin L1                                           | 56706      | -1.1        | -1.2  | -310            |
| Ddit4                                                                        | DNA-damage-inducible transcript 4                   | 74747      | -2.0        | -2.4  | -690            |
| Dnajc3b                                                                      | DnaJ (Hsp40) homolog, subfamily C, member 3         | 19107      | -1.1        | -1.2  | -170            |
| Fabp3                                                                        | fatty acid binding protein 3, muscle and heart      | 14077      | 1.6         | 1.6   | 120             |
| Fosl2                                                                        | fos-like antigen 2                                  | 14284      | -1.3        | -1.6  | -260            |
| Hecw2                                                                        | HECT, C2 and WW domain containing 2                 | 329152     | -1.5        | -1.5  | -140            |
| Pim3                                                                         | proviral integration site 3                         | 223775     | -1.7        | -2.0  | -580            |
| Sox4                                                                         | SRY-box containing gene 4                           | 20677      | 1.2         | 1.3   | 290             |
| Tnfsf10                                                                      | tumor necrosis factor superfamily, member 10        | 22035      | 1.4         | 1.4   | 130             |
| <b>Developmental</b>                                                         |                                                     |            |             |       |                 |
| Ankrd11                                                                      | ankyrin repeat domain 11                            | 77087      | -1.2        | -1.4  | -130            |
| App                                                                          | Amyloid beta (A4) precursor protein                 | 11820      | 1.4         | 1.3   | 100             |
| Axud1                                                                        | AXIN1 up-regulated 1                                | 215418     | -2.0        | -2.7  | -240            |
| Bmp1                                                                         | Bone morphogenetic protein 1                        | 12153      | -1.8        | -1.7  | -220            |
| Btg2                                                                         | B-cell translocation gene 2, anti-proliferative     | 12227      | -1.4        | -1.6  | -460            |
| Fzd4                                                                         | frizzled homolog 4 (Drosophila)                     | 14366      | -1.2        | -1.4  | -410            |
| Gdap10                                                                       | ganglioside-induced differentiation-associated 10   | 14546      | -1.2        | -1.3  | -160            |
| Klf7                                                                         | Kruppel-like factor 7 (ubiquitous)                  | 93691      | -1.1        | -1.2  | -200            |
| Klf9                                                                         | Kruppel-like factor 9                               | 16601      | -1.3        | -1.5  | -200            |
| Nrp1                                                                         | neuropilin 1                                        | 18186      | 1.8         | 1.9   | 340             |
| Prickle1                                                                     | prickle like 1                                      | 106042     | 1.2         | 1.3   | 190             |
| Prickle2                                                                     | Prickle-like 2                                      | 243548     | 1.3         | 1.3   | 130             |
| Rnf144a                                                                      | Ring finger protein 144                             | 108089     | 1.4         | 1.6   | 120             |
| Zbtb16                                                                       | Zinc finger and BTB domain containing 16            | 235320     | -1.0        | -1.9  | -200            |
| Zfp503                                                                       | zinc finger protein 503                             | 218820     | 1.1         | 1.3   | 370             |
| <b>Energy Metabolism</b>                                                     |                                                     |            |             |       |                 |
| Cyts                                                                         | cytochrome c, somatic                               | 13063      | 1.2         | 1.2   | 140             |
| Gdpd1                                                                        | glycerophosphodiester phosphodiesterase 1           | 66569      | -1.9        | -4.3  | -540            |
| Lpl                                                                          | lipoprotein lipase                                  | 16956      | 1.3         | 1.3   | 400             |
| Ndufc1                                                                       | NADH dehydrogenase 1, subcomplex unknown, 1         | 66377      | 1.1         | 1.3   | 160             |
| Ndufs8                                                                       | NADH dehydrogenase Fe-S protein 8                   | 225887     | 1.2         | 1.2   | 180             |
| Nnt                                                                          | nicotinamide nucleotide transhydrogenase            | 18115      | 1.1         | 1.3   | 150             |
| Slc2a3                                                                       | solute carrier family 2 member 3                    | 20527      | -2.2        | -1.8  | -130            |
| <b>Heme Oxygenase Related</b>                                                |                                                     |            |             |       |                 |
| Alas1                                                                        | Aminolevulinic acid synthase 1                      | 11655      | -1.4        | -1.5  | -130            |
| Bach1                                                                        | BTB and CNC homology 1                              | 12013      | -1.1        | -1.4  | -210            |
| Cyp2e1                                                                       | cytochrome P450, family 2, e1                       | 13106      | 1.4         | 1.5   | 140             |
| Egln3                                                                        | EGL nine homolog 3                                  | 112407     | 1.3         | 1.5   | 140             |
| Elk-3                                                                        | ELK3, member of ETS oncogene family                 | 13713      | 1.4         | 1.5   | 120             |
| <b>Extracellular Matrix &amp; Cell Adhesion</b>                              |                                                     |            |             |       |                 |
| Adamts15                                                                     | A disintegrin-like and metalloprotease 15           | 235130     | -1.2        | -1.4  | -160            |
| Clec4d                                                                       | C-type lectin domain family 4, member d             | 17474      | -3.9        | -3.7  | -140            |
| Col1a1                                                                       | procollagen, type I, alpha 1                        | 12842      | 1.1         | 1.3   | 230             |
| <td>fibronectin 1</td> <td>14268</td> <td>1.4</td> <td>1.5</td> <td>550</td> | fibronectin 1                                       | 14268      | 1.4         | 1.5   | 550             |
| Lgals1                                                                       | lectin, galactose binding, soluble 1                | 16852      | 1.2         | 1.4   | 350             |
| Mmp9                                                                         | matrix metalloproteinase 9                          | 17395      | -2.5        | -2.6  | -120            |
| Mt2                                                                          | metallothionein 2                                   | 17750      | -1.7        | -1.4  | -150            |
| Npnt                                                                         | nephronectin                                        | 114249     | -1.0        | -1.2  | -230            |
| s100a8                                                                       | S100 calcium binding protein A8 (calgranulin A)     | 20201      | -5.7        | -4.2  | -1920           |
| s100a9                                                                       | S100 calcium binding protein A9 (calgranulin B)     | 20202      | -6.3        | -5.0  | -1730           |
| <b>Other Functions</b>                                                       |                                                     |            |             |       |                 |
| Ddost                                                                        | dolichyl-di-phosphooligosaccharide glycotransferase | 13200      | 1.2         | 1.4   | 160             |
| Eif4a1                                                                       | eukaryotic translation initiation factor 4A1        | 13681      | 1.2         | 1.4   | 200             |
| Fbxo39                                                                       | F-box protein 39                                    | 327959     | 7.4         | 13.7  | 760             |
| Gda                                                                          | guanine deaminase                                   | 14544      | -1.5        | -1.4  | -100            |
| Grina                                                                        | glutamate receptor, ionotropic                      | 66168      | -1.3        | -1.3  | -260            |
| H3f3b                                                                        | H3 histone, family 3B                               | 15081      | -5.5        | -4.6  | -230            |
| Lyve1                                                                        | extra cellular link domain-containing 1             | 114332     | -1.1        | -1.3  | -280            |
| Msi2                                                                         | Musashi homolog 2 (Drosophila)                      | 76626      | -1.8        | -3.8  | -570            |
| Ndel1                                                                        | nuclear distribution gene E-like homolog 1          | 83431      | -1.3        | -2.7  | -180            |
| Per1                                                                         | period homolog 1                                    | 18626      | -1.6        | -2.3  | -430            |
| Sgk                                                                          | serum/glucocorticoid regulated kinase               | 20393      | -1.3        | -1.3  | -420            |
| Slc10a6                                                                      | solute carrier family 10 member 6                   | 75750      | -1.2        | -1.5  | -230            |
| Vezf1                                                                        | vascular endothelial zinc finger 1                  | 22344      | 1.4         | 1.3   | 120             |
| Zswim6                                                                       | zinc finger, SWIM domain containing 6               | 67263      | -1.1        | -1.2  | -150            |
